# Supplementary material
Source: Springer Nature journal article supplement (https://www.springermedizin.de/resource/supplementary/13017_2012_230_MOESM1_ESM.pdf/9635822)

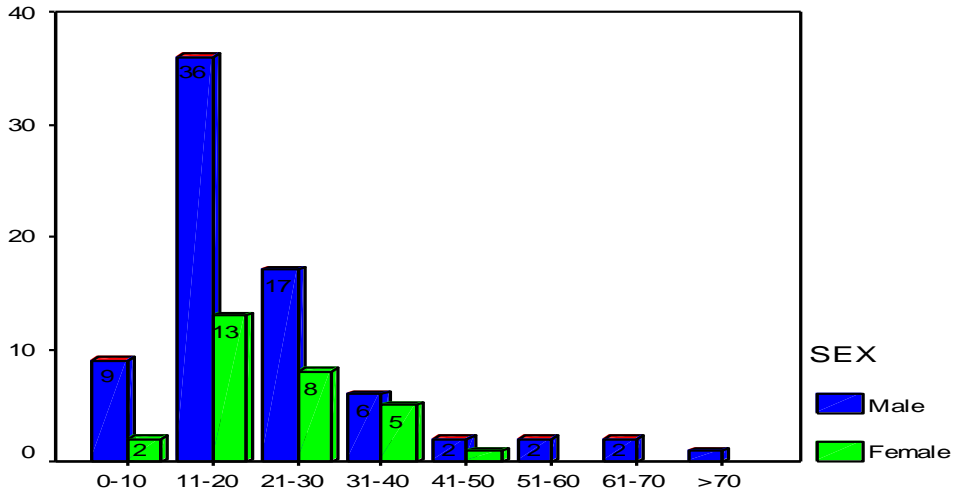

Supplement: MOESM1 [file 9635822]
